# Supplementary material for: Fe-decorated-NiCo layered double hydroxide nanoflakes via corrosion engineering for high-energy rechargeable Zn-based batteries
Source: Royal Society of Chemistry journal article supplement (doi:10.1039/d2ta04769a), 2022-01-01
Supplement: d2ta04769a1.pdf [file d2ta04769a1.pdf]

## Supporting information

### Fe-decorated-NiCo Layered Double Hydroxide Nanoflakes via Corrosion Engineering for High-Energy Rechargeable Zn-Based Battery

Jianning Zeng, Jinhao Xie, Jie Liu, Zilong Wang\*, Xianshuo Cao,\* and Xihong Lu\*

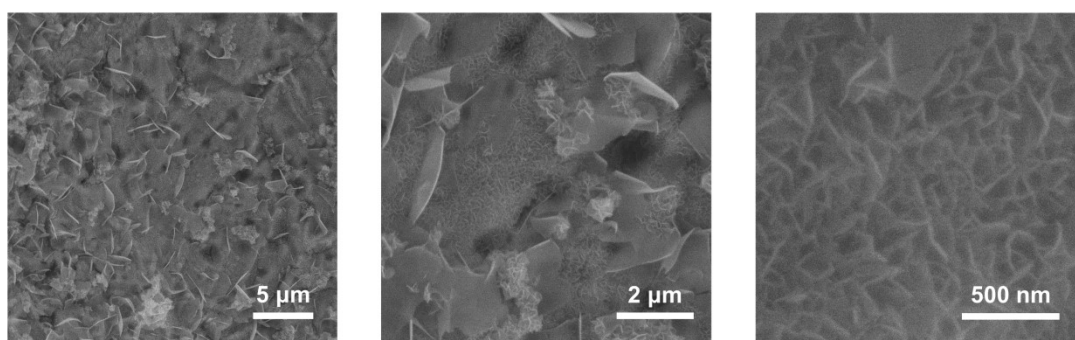

**Fig. S1.** SEM images of the FeNiCo LDH sample in different magnification.

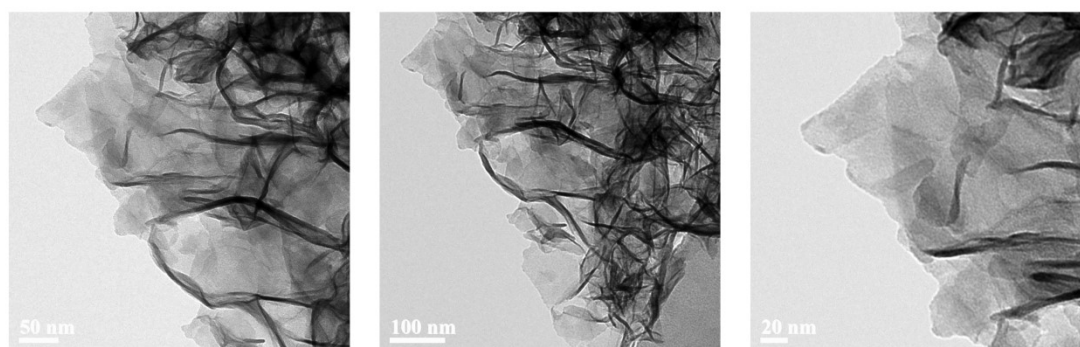

**Fig. S2.** TEM images of FeNiCo LDH sample.

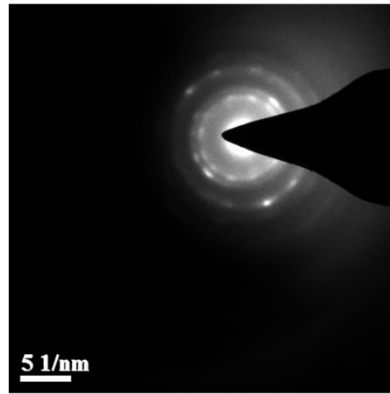

**Fig. S3.** SAED pattern of FeNiCo LDH sample.

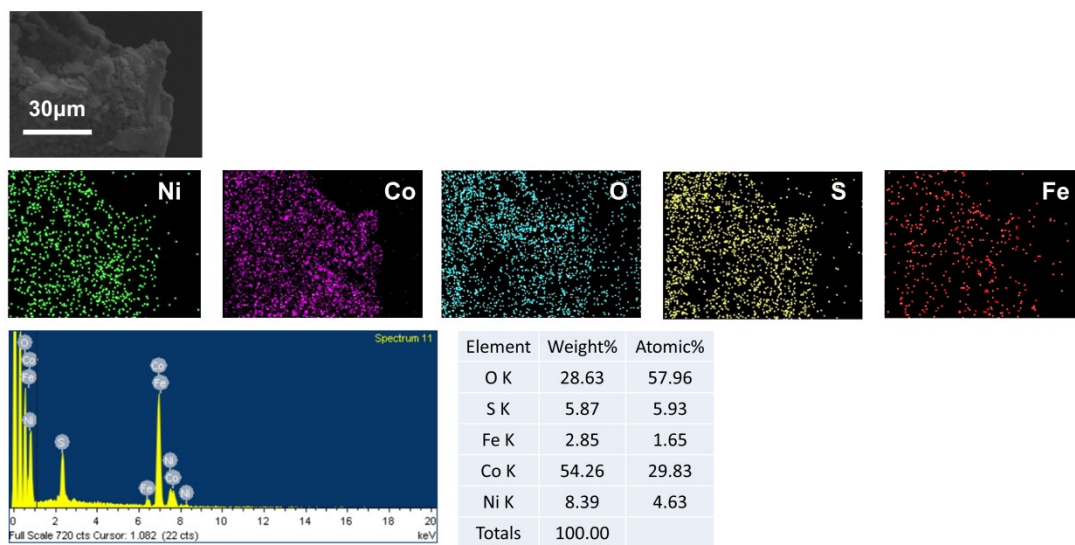

**Fig. S4.** Mapping of FeNiCo LDH sample.

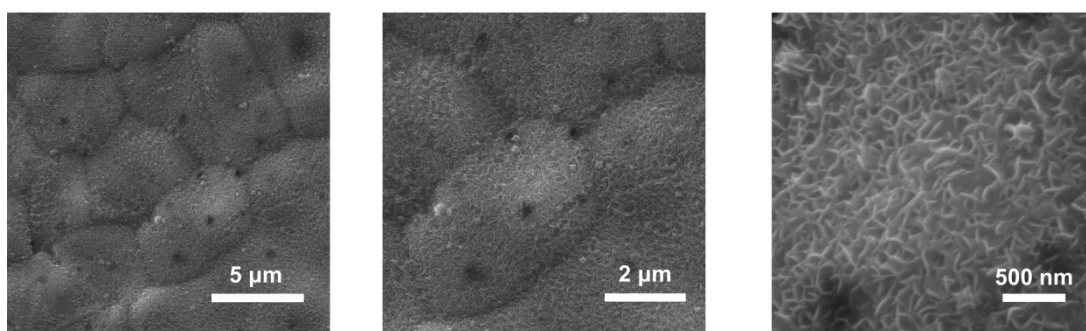

**Fig. S5.** SEM images of the NiCo LDH sample in different magnification.

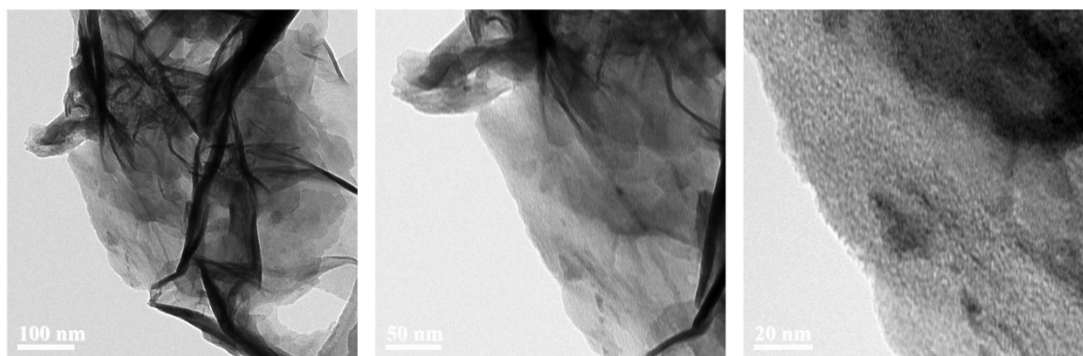

**Fig. S6.** TEM images of the NiCo LDH sample in different magnification.

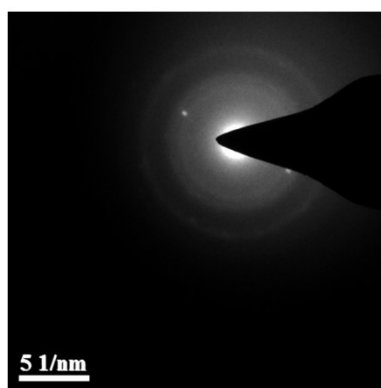

**Fig. S7.** SAED pattern of NiCo LDH sample.

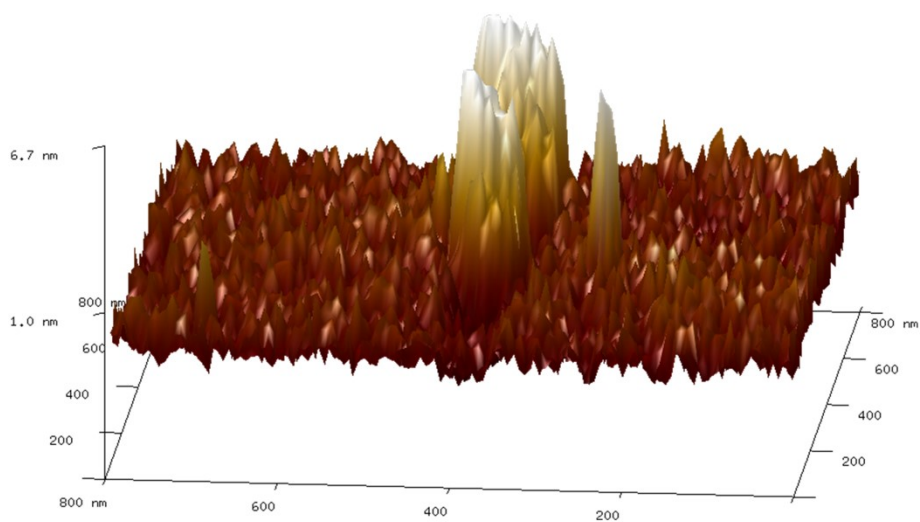

**Fig. S8.** 3D graph of a monodisperse LDH measured by AFM of NiCo LDH.

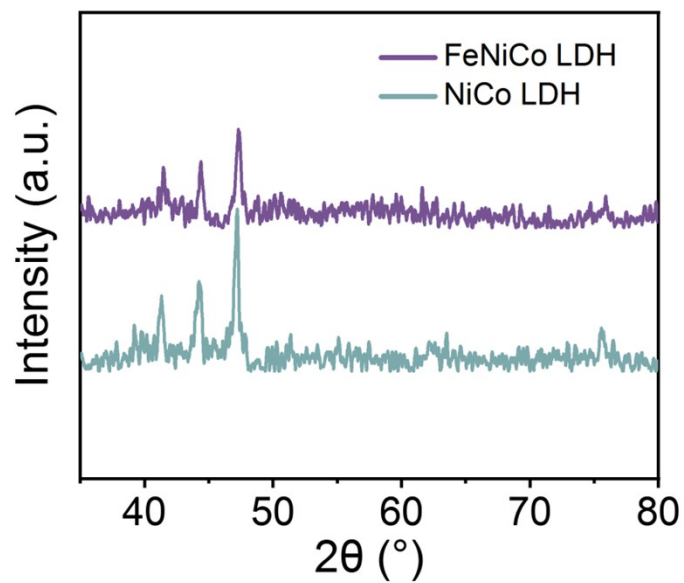

**Fig. S9.** XRD patterns of FeNiCo LDH and NiCo LDH sample.

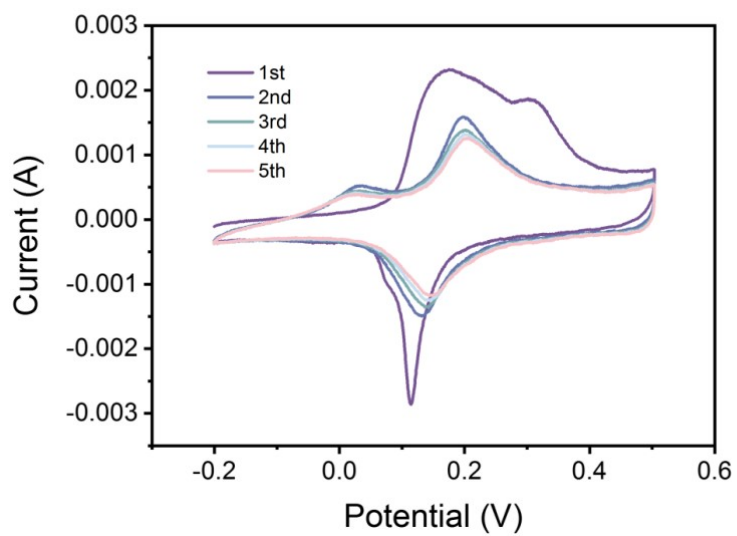

**Fig. S10.** CV curves of NiCo LDH electrodes at 10 mV s<sup>-1</sup>.

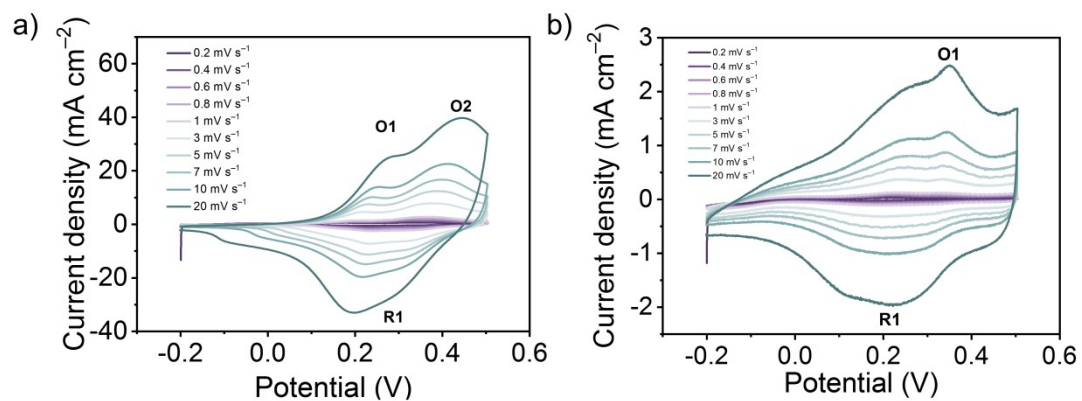

**Fig. S11.** CV curves from the scan rate from 0.2 mV s<sup>-1</sup>-20 mV s<sup>-1</sup> of (a) FeNiCo LDH and (b) NiCo LDH samples.

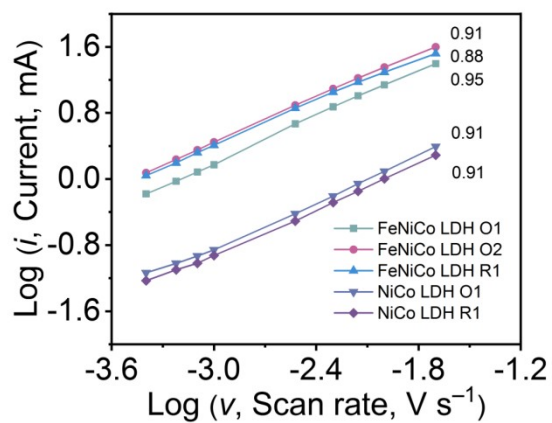

**Fig. S12.** Log (*i*) versus log (*v*) plots of NiCo LDH and FeNiCo LDH electrodes.

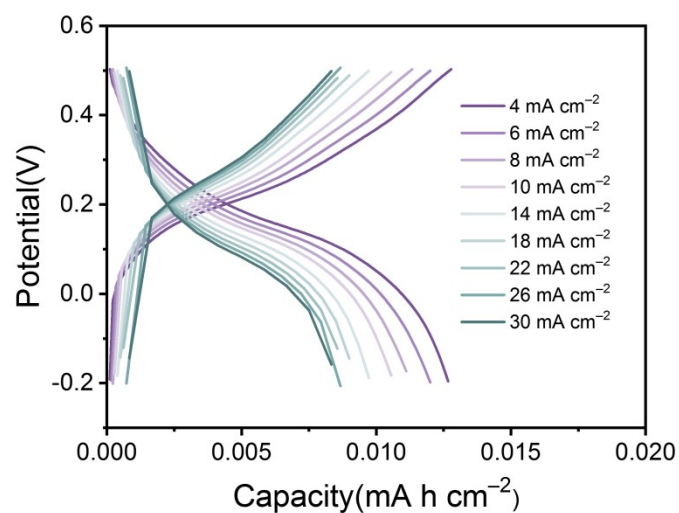

**Fig. S13.** GCD curves of NiCo LDH electrodes collected at 4-30 mA cm<sup>-2</sup>.

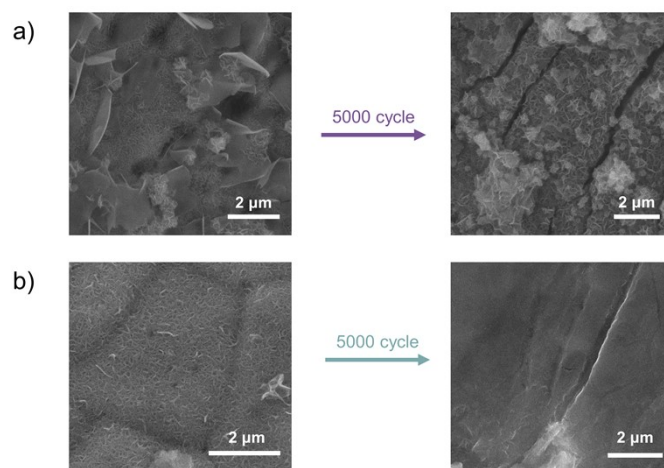

**Fig.S14.** SEM images of (a) FeNiCo LDH and (b) NiCo LDH sample before and after cycle.

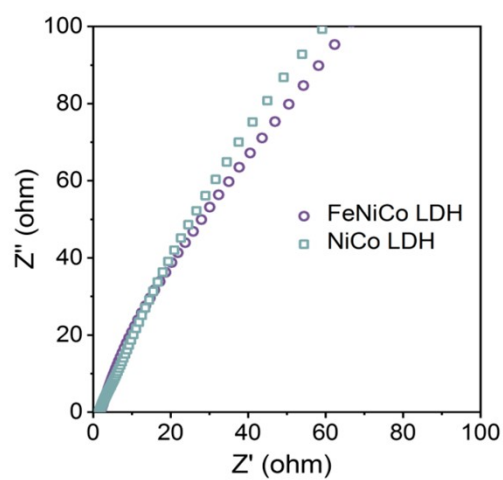

**Fig. S15.** Nyquist plots for the FeNiCo LDH and the NiCo LDH electrodes.

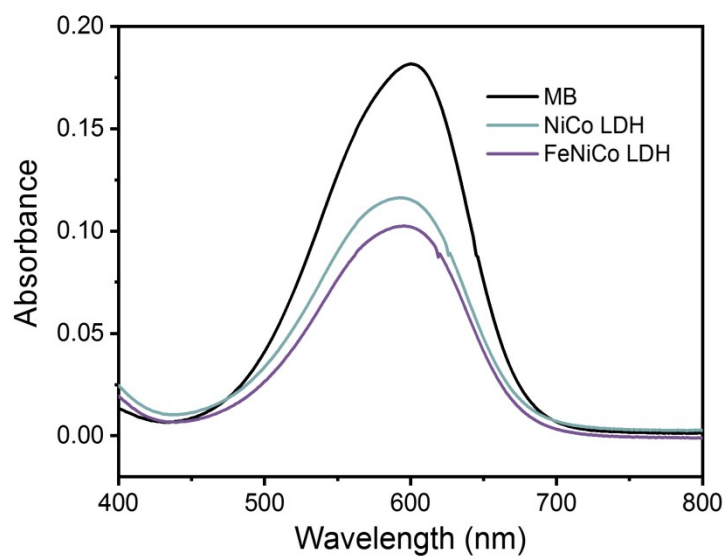

**Fig. S16.** UV-vis absorption spectra collected for the original MB solution ( $0.5 \text{ mg L}^{-1}$  in water) and for the MB solutions after reacting with FeNiCo LDH and NiCo LDH for 12 h.
